# Supplementary material for: On-demand electrochemically controlled compound release from an ultrasonically powered implant
Source: Royal Society of Chemistry journal article supplement (doi:10.1039/d2ra03422k), 2022-01-01
Supplement: d2ra03422k1.pdf [file d2ra03422k1.pdf]

## Electronic Supplementary Information

### On-Demand Electrochemically Controlled Compound Release from an Ultrasonically Powered Implant

Max L. Wang<sup>a,‡</sup>, Christian F. Chamberlayne<sup>b,‡</sup>, Haixia Xu<sup>c,‡</sup>, Mohammad Mofidfar<sup>b,‡</sup>, Spyridon Baltasvias<sup>a</sup>, Justin P. Annes<sup>c</sup>, Richard N. Zare<sup>b</sup>, Amin Arbabian<sup>a</sup>

<sup>a</sup> Department of Electrical Engineering, Stanford University, Stanford, CA, USA

<sup>b</sup> Department of Chemistry, Stanford University, Stanford, CA, USA

<sup>c</sup> Department of Medicine, Division of Endocrinology, Stanford University, Stanford, CA, USA

<sup>‡</sup> These authors contributed equally to this work.

Corresponding author email: [arbabian@stanford.edu](mailto:arbabian@stanford.edu)

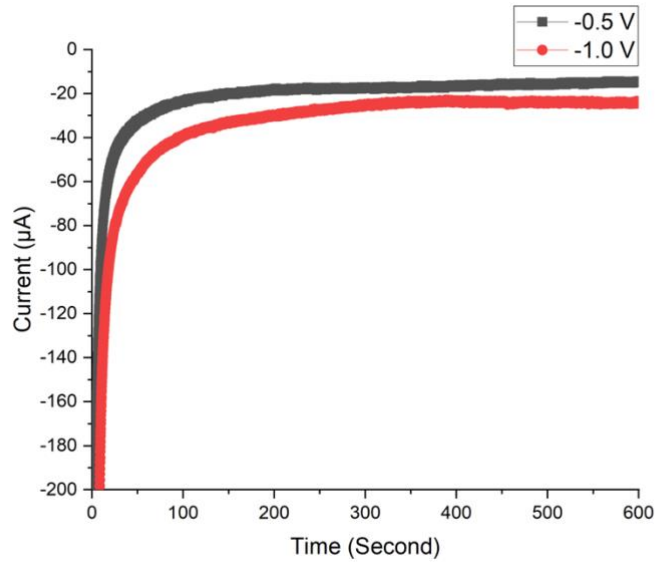

**Fig. S1** Measured chronoamperogram of the fluorescein loaded nanoparticulate film during 10 min stimulation at -0.5 V (black) and -1 V (red).

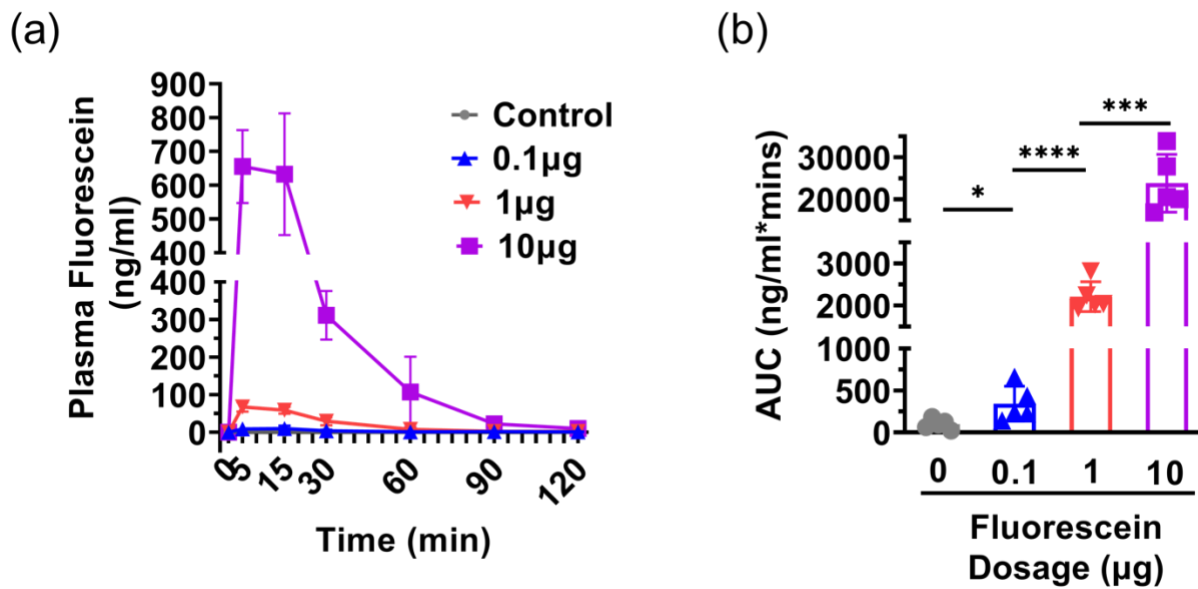

**Fig. S2** (a) Dose curve of fluorescein after subcutaneous injection in male C57BL/6J mice (N=5/group) and (b) area under curve. Data represented as mean  $\pm$  SD. \* $P < 0.05$ , \*\*\* $P < 0.001$ , \*\*\*\* $P < 0.0001$
